# Supplementary material for: Nonanatomic resection is not inferior to anatomic resection for primary intrahepatic cholangiocarcinoma: A propensity score analysis
Source: PubMed Central journal article supplement (PMC6290773; doi:10.1038/s41598-018-35911-5), 2018-12-12
Supplement: 41598_2018_35911_MOESM1_ESM.pdf [file 41598_2018_35911_MOESM1_ESM.pdf]

**Nonanatomic resection is not inferior to anatomic resection for primary intrahepatic cholangiocarcinoma: A propensity score analysis**

Li Bo<sup>1</sup>, Song Jiulin<sup>1</sup>, Aierken Yiliyaer<sup>1</sup>, Chen Yang<sup>1</sup>, Zheng Jinli<sup>1</sup>, Yang Jiayin<sup>1\*</sup>

<sup>1</sup>Liver Transplantation Center, Department of Liver Surgery, West China Hospital of Sichuan University, Chengdu 610041, Sichuan Province, China.

\*corresponding.author@email.yang\_jy123@sina.com

## Table S1

### The distribution of tumor location in the AR and NAR groups

| tumor location | AR (n=85)    | NAR (n=65) | <i>P</i> value |
|----------------|--------------|------------|----------------|
|                |              |            | <0.001*        |
| Left liver     | 46 (54.1%)   | 8 (12.3%)  |                |
| Right liver    | 31.3 (36.5%) | 48 (73.8%) |                |
| Middle liver   | 8 (9.4%)     | 9 (13.8%)  |                |

\* Indicates statistically significant.

AR, anatomic resection; NAR, nonanatomic resection.
